# Supplementary material for: Leveraging the Fragment Molecular Orbital and MM-GBSA Methods in Virtual Screening for the Discovery of Novel Non-Covalent Inhibitors Targeting the TEAD Lipid Binding Pocket
Source: MDPI journal article supplement (doi:10.3390/ijms25105358), 2024-05-14
Supplement: s1 [file s1]

# Leveraging the Fragment Molecular Orbital and MM-GBSA Methods in Virtual Screening for the Discovery of Novel Non-Covalent Inhibitors Targeting the TEAD Lipid Binding Pocket

Jongwan Kim <sup>1,2,\*,†</sup>, Haiyan Jin <sup>2,3,†</sup>, Jinhyuk Kim <sup>3,4</sup>, Seon Yeon Cho <sup>4</sup>, Sungho Moon <sup>4</sup>, Jianmin Wang <sup>3</sup>, Jiashun Mao <sup>3</sup> and Kyoung Tai No <sup>2,3,4,5,\*</sup>

<sup>1</sup> Department of Structural Biology, St. Jude Children's Research Hospital, Memphis, TN 38105, USA

<sup>2</sup> Bioinformatics and Molecular Design Research Center (BMDRC), Incheon 21983, Republic of Korea; haiyanjin@yonsei.ac.kr

<sup>3</sup> The Interdisciplinary Graduate Program in Integrative Biotechnology & Translational Medicine, Yonsei University, Incheon 21983, Republic of Korea; yetyet123@yonsei.ac.kr (J.K.); jmwang113@hotmail.com (J.W.); jiashun\_mao@yonsei.ac.kr (J.M.)

<sup>4</sup> Baobab AiBIO Co., Ltd., Incheon 21983, Republic of Korea; sycho@baobabaibio.com (S.Y.C.); shmoon@baobabaibio.com (S.M.)

<sup>5</sup> Department of Biotechnology, Yonsei University, Seoul 03722, Republic of Korea

\* Correspondence: myulchi@yonsei.ac.kr (J.K.), ktno@yonsei.ac.kr (K.T.N.)

† These authors contributed equally to this work.

| Index | Shape type    | Query number | Similarity normalization | ROC  | RIE   | Number of ranked actives |
|-------|---------------|--------------|--------------------------|------|-------|--------------------------|
| 1     | Pharmacophore | 28           | Maximum                  | 0.99 | 16.89 | 28                       |
| 2     | Pharmacophore | 7            | Maximum                  | 0.46 | 8.67  | 13                       |
| 3     | Typed atom    | 28           | Maximum                  | 0.99 | 17.22 | 28                       |
| 4     | Typed atom    | 7            | Maximum                  | 0.43 | 8.02  | 12                       |
| 5     | Pharmacophore | 28           | query structure          | 0.78 | 13.52 | 22                       |
| 6     | Pharmacophore | 7            | query structure          | 0.28 | 5.32  | 8                        |
| 7     | Pharmacophore | 28           | Minimum                  | 0.21 | 3.73  | 6                        |
| 8     | Pharmacophore | 7            | Minimum                  | 0.04 | 0.68  | 1                        |
| 9     | Pharmacophore | 28           | Screen structure         | 0.21 | 3.83  | 6                        |
| 10    | Pharmacophore | 7            | Screen structure         | 0.07 | 1.37  | 2                        |

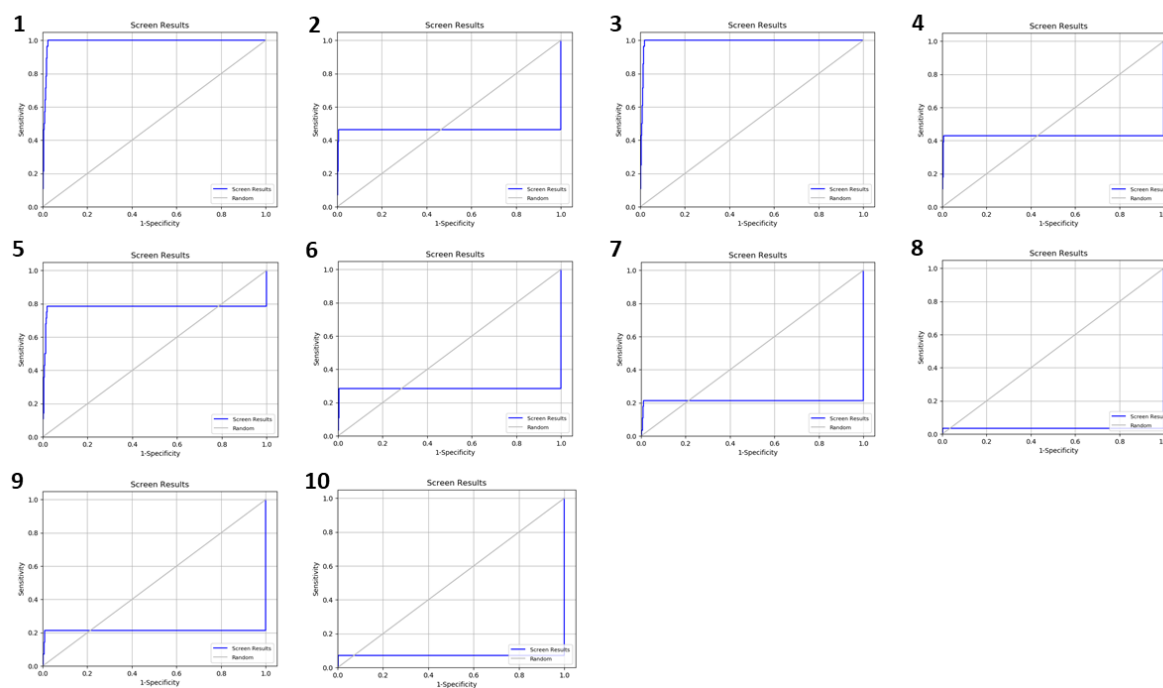

**Figure S1.** Enrichment calculation results of shape-based screening test.

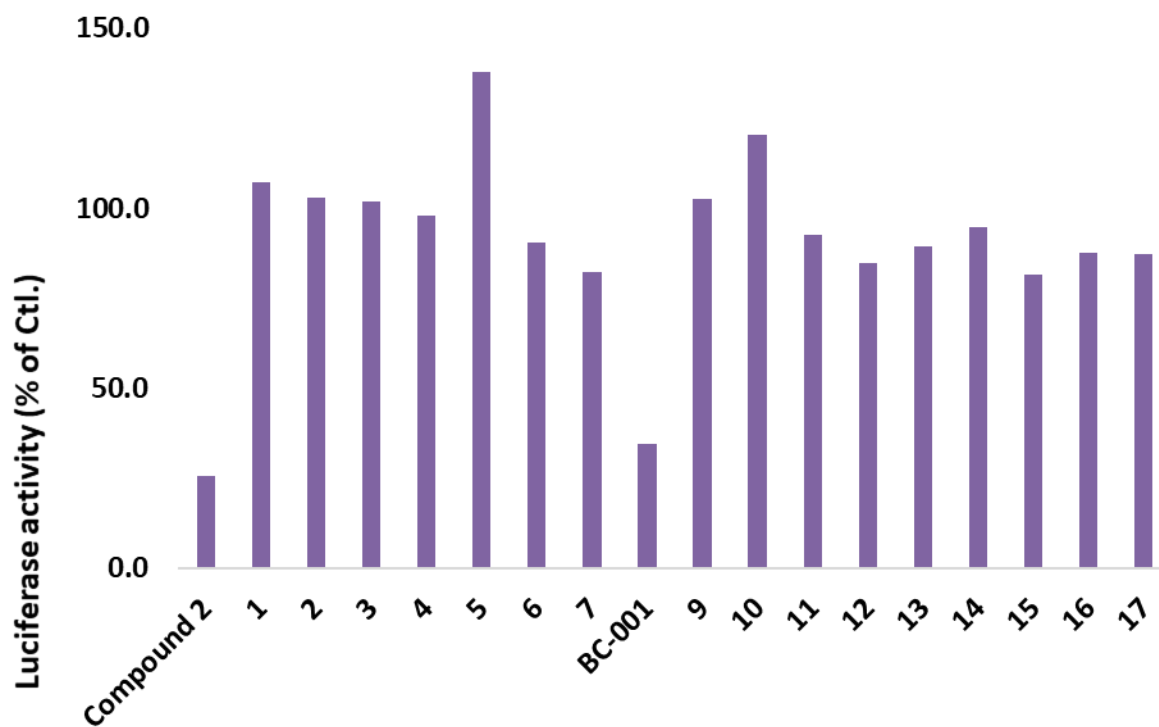

**Figure S2.** The TEAD luciferase reporter assay of 17 virtual hits.

TEAD reporter luciferase activity was observed in MCF7 cells treated with 10  $\mu$ M of Compound 2 and 17 virtual hits.

**A**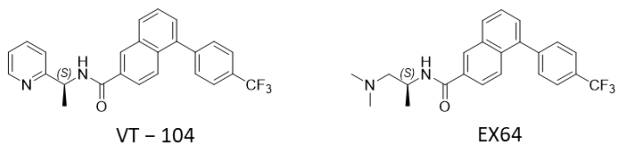

| Compound | 5ns<br>(kcal/mol) | 10ns<br>(kcal/mol) | 20ns<br>(kcal/mol) | 50ns<br>(kcal/mol) | 100ns<br>(kcal/mol) | RMSD Stable<br>(kcal/mol) | IC50 (μM) |
|----------|-------------------|--------------------|--------------------|--------------------|---------------------|---------------------------|-----------|
| VT-104   | -86.02            | -84.95             | -83.39             | -80.73             | -80.81              | -83.25                    | 0.01      |
| EX64     | -76.72            | -72.57             | -72.59             | -73.15             | -71.75              | -73.15                    | 1~3       |

-86.02 (kcal/mol)
-76.72 (kcal/mol)

**B**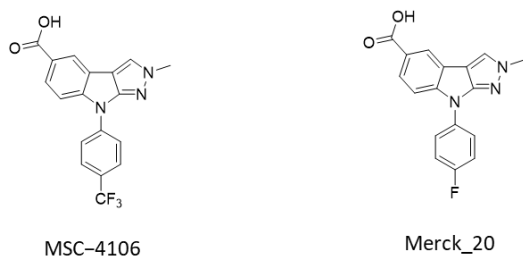

| Compound | 5ns<br>(kcal/mol) | 10ns<br>(kcal/mol) | 20ns<br>(kcal/mol) | 50ns<br>(kcal/mol) | 100ns<br>(kcal/mol) | RMSD Stable<br>(kcal/mol) | IC50(μM) |
|----------|-------------------|--------------------|--------------------|--------------------|---------------------|---------------------------|----------|
| MSC-4106 | -64.37            | -64.2              | -63.92             | -63.73             | -63.79              | -63.68                    | 0.014    |
| Merck_20 | -60.84            | -60.18             | -59.44             | -59.2              | -59.51              | -59.91                    | 1~10     |

-64.37 (kcal/mol)
-59.20 (kcal/mol)

**Figure S3.** Retrospective prediction of post-MD MM-GBSA  $\Delta G$  of Vivace and Merck compounds. We chose the 5ns, 10ns, 20ns, 50ns, RMSD more stable frame region from the 100 ns trajectory to calculate the post-MD MM-GBSA  $\Delta G$  values. A. Vivace and B. Merck compounds. MD, molecular dynamics; MM, molecular mechanics; GBSA, Generalized Born Surface Area; RMSD, root mean square deviation.

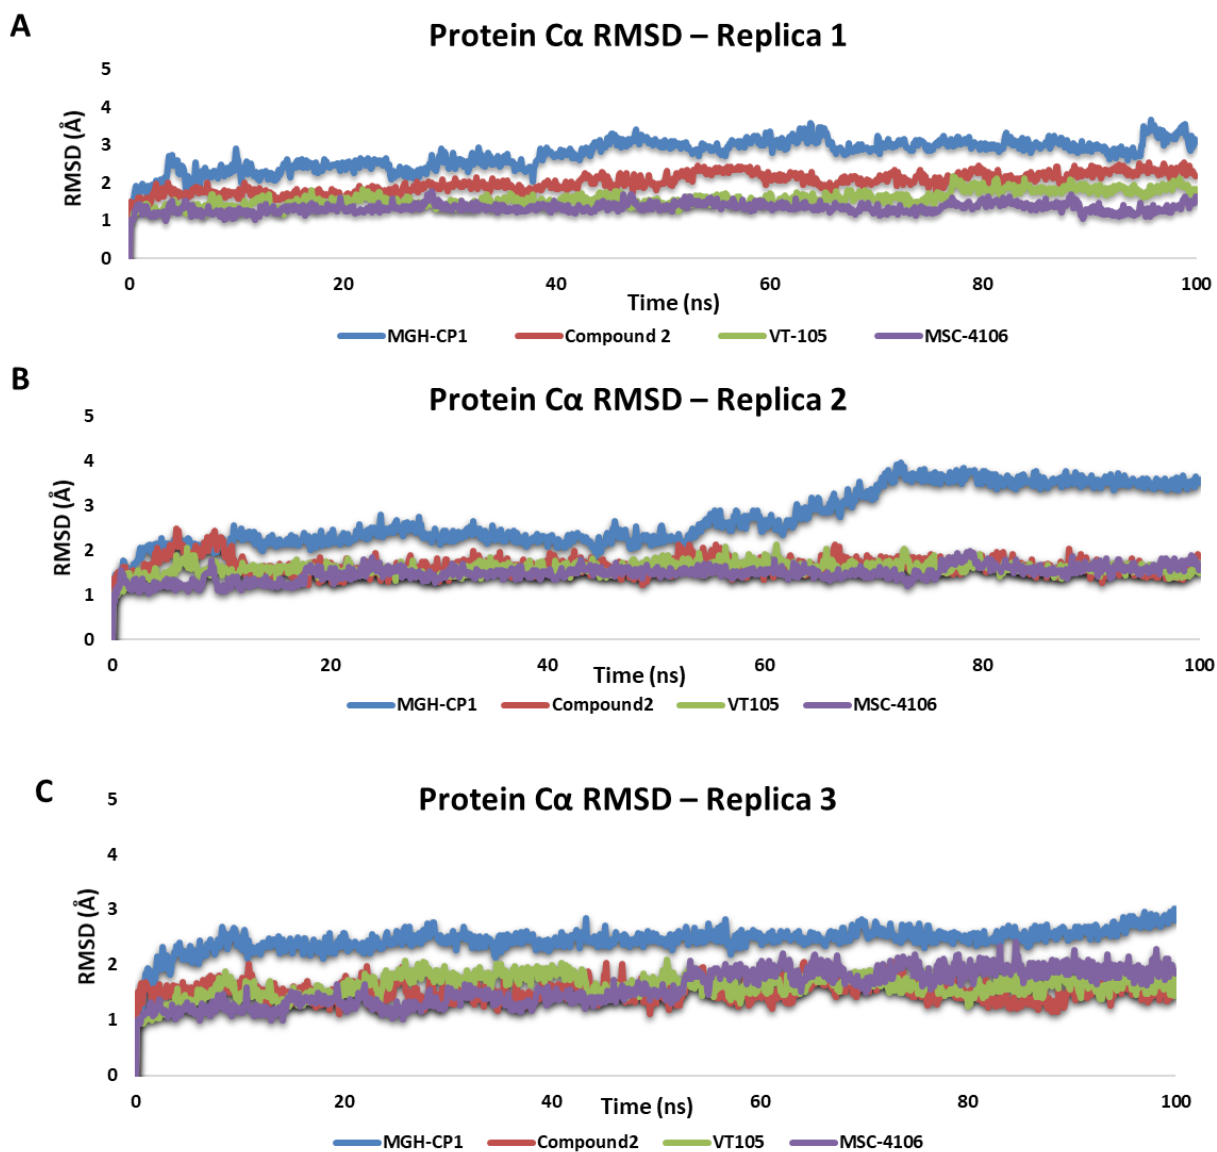

**Figure S4.** Protein Cα RMSD calculations of 3 different replicas.

A. Protein Cα RMSD of replica 1, also shown in Figure 5A. B. Protein Cα RMSD of replica 2.

C. Protein Cα RMSD of replica 3.

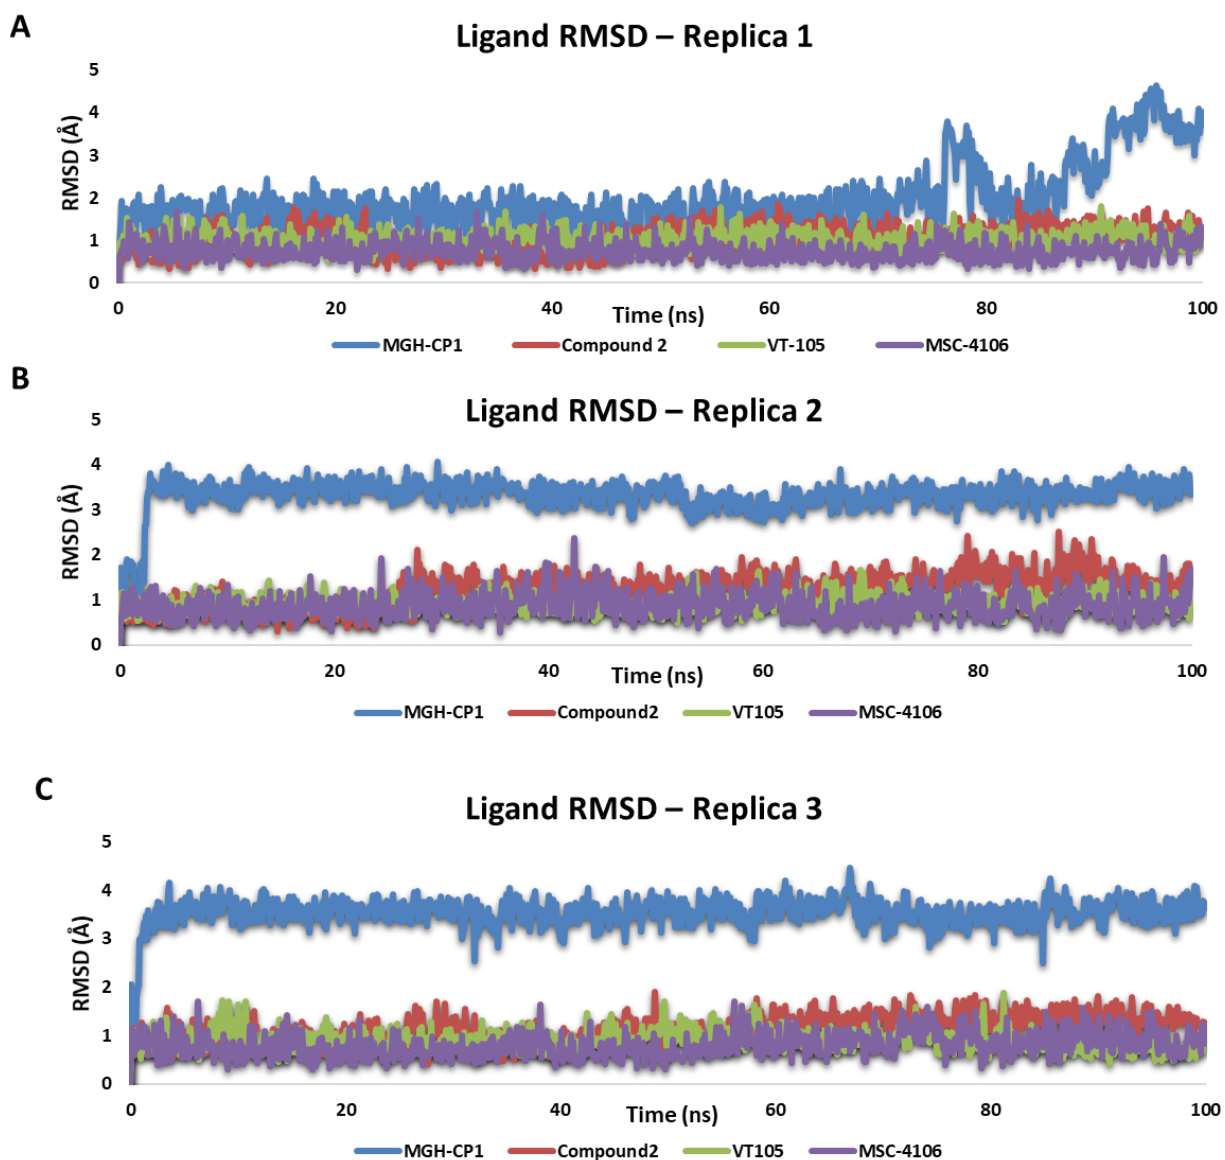

**Figure S5.** Ligand RMSD calculations of 3 different replicas

A. Ligand RMSD of replica 1, also shown in Figure 5B. B. Ligand RMSD of replica 2. C. Ligand RMSD of replica 3.

## Synthetic scheme

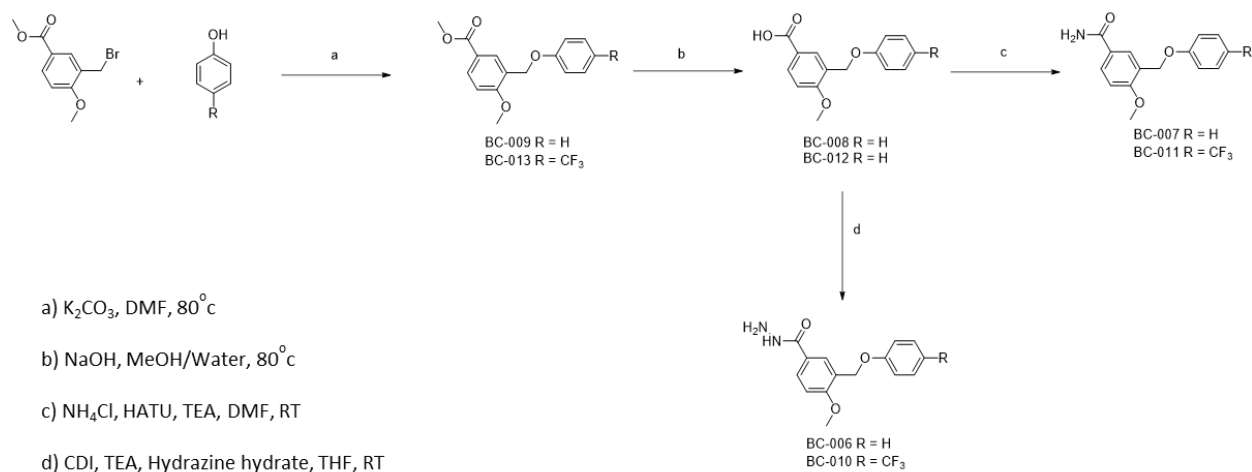

**Figure S6.** The synthetic scheme of compounds in the paper.

**Table S1.** PIEDA of MGH-CP1 and TEAD2 complex. All energies are in kcal/mol. The calculation was conducted at the FMO-MP2/6-31G\*\*/PCM level.

| Residue | $\Delta E^{\text{int}}$ | $\Delta E^{\text{es}}$ | $\Delta E^{\text{ex}}$ | $\Delta E^{\text{ct+mix}}$ | $\Delta E^{\text{di}}$ | $\Delta G_{\text{sol}}$ |
|---------|-------------------------|------------------------|------------------------|----------------------------|------------------------|-------------------------|
| Ile408  | -3.79                   | -0.798                 | 2.75                   | -1.436                     | -4.456                 | 0.149                   |
| Leu383  | -3.038                  | -1.249                 | 5.961                  | -1.568                     | -6.215                 | 0.033                   |
| Lys357  | -6.385                  | -1.324                 | 2.334                  | -1.05                      | -4.225                 | -2.12                   |
| Met379  | -5.148                  | -1.509                 | 1.33                   | -1.015                     | -4.143                 | 0.188                   |
| Phe428  | -5.063                  | -2.67                  | 7.243                  | -1.69                      | -7.992                 | 0.047                   |
| Ser345  | -4.552                  | -3.644                 | 0.299                  | -0.715                     | -1.46                  | 0.967                   |
| Val329  | -4.998                  | -7.116                 | 12.293                 | -2.592                     | -7.162                 | -0.421                  |

Solvent: water



**Table S2.** PIEDA of Compound2 and TEAD2 complex. All energies are in kcal/mol. The calculation was conducted at the FMO-MP2/6-31G\*\*/PCM level.

| Residue | $\Delta E^{\text{int}}$ | $\Delta E^{\text{es}}$ | $\Delta E^{\text{ex}}$ | $\Delta E^{\text{ct+mix}}$ | $\Delta E^{\text{di}}$ | $\Delta G^{\text{sol}}$ |
|---------|-------------------------|------------------------|------------------------|----------------------------|------------------------|-------------------------|
| Cys380  | -11.701                 | -14.899                | 13.607                 | -3.761                     | -6.485                 | -0.162                  |
| Gln410  | -4.995                  | -3.442                 | 1.077                  | -1.131                     | -2.47                  | 0.971                   |
| Ile408  | -5.019                  | -0.982                 | 2.905                  | -1.374                     | -5.606                 | 0.038                   |
| Leu383  | -3.517                  | -3.5                   | 8.17                   | -1.754                     | -6.354                 | -0.079                  |
| Lys357  | -6.395                  | -4.381                 | 0.329                  | -0.391                     | -1.429                 | -0.523                  |
| Phe233  | -3.074                  | -2.347                 | 6.792                  | -1.587                     | -5.853                 | -0.079                  |
| Phe428  | -4.875                  | -1.219                 | 3.589                  | -1.688                     | -5.715                 | 0.158                   |
| Ser345  | -4.941                  | -2.955                 | 0.643                  | -0.794                     | -2.024                 | 0.189                   |

Solvent: water

**Table S3.** PIEDA of MSC-4106 and TEAD1 complex. All energies are in kcal/mol. The calculation was conducted at the FMO-MP2/6-31G\*\*/PCM level.

| Residue | $\Delta E^{\text{int}}$ | $\Delta E^{\text{es}}$ | $\Delta E^{\text{ex}}$ | $\Delta E^{\text{ct+mix}}$ | $\Delta E^{\text{di}}$ | $\Delta G_{\text{sol}}$ |
|---------|-------------------------|------------------------|------------------------|----------------------------|------------------------|-------------------------|
| Cys359  | -34.712                 | -31.926                | 6.611                  | -4.75                      | -5.173                 | -1.617                  |
| Ile366  | -4.218                  | -1.68                  | 1.362                  | -0.888                     | -2.639                 | -2.928                  |
| Leu369  | -3.217                  | -1.501                 | 0.098                  | -0.397                     | -0.623                 | -3.843                  |
| Lys336  | -103.158                | -105.175               | 3.44                   | -3.812                     | -5.013                 | 5.136                   |
| Met362  | -11.756                 | -7.957                 | 6.413                  | -2.116                     | -7.884                 | -2.547                  |
| Phe221  | -5.854                  | -2.876                 | 4.225                  | -1.439                     | -6.674                 | -1.893                  |
| Phe224  | -3.224                  | -3.474                 | -0.001                 | 0.037                      | -0.285                 | -4.343                  |
| Phe239  | -5.301                  | -2.167                 | 0.527                  | -0.845                     | -2.166                 | -3.444                  |
| Phe407  | -6.264                  | -2.703                 | 4.785                  | -1.985                     | -6.851                 | -1.885                  |
| Thr324  | -9.289                  | -4.816                 | 1.13                   | -0.792                     | -2.093                 | -4.966                  |
| Val240  | -6.207                  | -2.708                 | 2.756                  | -1.387                     | -5.023                 | -2.478                  |

Solvent: water

**Table S4.** PIEDA of VT-105 and TEAD3 complex. All energies are in kcal/mol. The calculation was conducted at the FMO-MP2/6-31G\*\*/PCM level.

| Residue | $\Delta E^{\text{int}}$ | $\Delta E^{\text{es}}$ | $\Delta E^{\text{ex}}$ | $\Delta E^{\text{ct+mix}}$ | $\Delta E^{\text{di}}$ | $\Delta G_{\text{sol}}$ |
|---------|-------------------------|------------------------|------------------------|----------------------------|------------------------|-------------------------|
| Ala232  | -3.032                  | -1.753                 | 2.194                  | -0.846                     | -2.846                 | 0.218                   |
| Cys368  | -13.387                 | -11.272                | 5.631                  | 0.868                      | -8.099                 | -0.515                  |
| Glu344  | -4.374                  | -4.699                 | 0.493                  | -0.452                     | -1.659                 | 1.942                   |
| Lys345  | -4.331                  | -1.714                 | 10.307                 | -2.607                     | -9.223                 | -1.094                  |
| Met367  | -8.886                  | -5.247                 | 13.005                 | -4.804                     | -11.406                | -0.434                  |
| Met371  | -9.577                  | -5.489                 | 5.072                  | -1.989                     | -6.853                 | -0.318                  |
| Phe248  | -4.643                  | -0.756                 | 2.387                  | -1.643                     | -4.532                 | -0.098                  |
| Phe416  | -4.711                  | -3.816                 | 8.2                    | -1.774                     | -7.382                 | 0.06                    |
| Tyr230  | -5.79                   | -4.954                 | 4.599                  | -1.45                      | -4.292                 | 0.307                   |

Solvent: water

**Table S5.** PIEDA of BC-001 and TEAD2 complex. All energies are in kcal/mol. The calculation was conducted at the FMO-MP2/6-31G\*\*/PCM level.

| Residue | $\Delta E^{\text{int}}$ | $\Delta E^{\text{es}}$ | $\Delta E^{\text{ex}}$ | $\Delta E^{\text{ct+mix}}$ | $\Delta E^{\text{di}}$ | $\Delta G_{\text{sol}}$ |
|---------|-------------------------|------------------------|------------------------|----------------------------|------------------------|-------------------------|
| Cys380  | -16.161                 | -18.946                | 14.835                 | -4.764                     | -6.804                 | -0.483                  |
| Leu383  | -7.186                  | -3.462                 | 5.204                  | -1.952                     | -6.673                 | -0.303                  |
| Lys357  | -4.372                  | 1.883                  | 2.921                  | -1.128                     | -3.73                  | -4.318                  |
| Met379  | -15.937                 | -17.403                | 15.795                 | -5.773                     | -9.539                 | 0.984                   |
| Phe233  | -4.05                   | -2.166                 | 3.856                  | -1.301                     | -4.423                 | -0.017                  |
| Phe428  | -5.765                  | -2.713                 | 3.947                  | -1.624                     | -5.434                 | 0.06                    |
| Ser345  | -3.967                  | -2.888                 | 0.05                   | -0.317                     | -0.666                 | -0.146                  |
| Tyr426  | -3.028                  | -1.372                 | 2.001                  | -0.995                     | -2.759                 | 0.096                   |

Solvent: water

**Table S6.** The post-MD MM-GBSA analysis of three different replicas.

| Compound | 5ns      |          |          |        |       | 10ns     |          |          |        |       |
|----------|----------|----------|----------|--------|-------|----------|----------|----------|--------|-------|
|          | Replica1 | Replica2 | Replica3 | Mean   | SD    | Replica1 | Replica2 | Replica3 | Mean   | SD    |
| BC-001   | -73.46   | -61.35   | -68.83   | -67.88 | 6.11  | -68.64   | -62.63   | -69.83   | -67.03 | 3.86  |
| BC-002   | -67.38   | -68.88   | -42.18   | -59.48 | 15.00 | -65.99   | -64.72   | -46.89   | -59.20 | 10.68 |
| BC-003   | -71.58   | -67.69   | -63.10   | -67.46 | 4.24  | -68.34   | -64.91   | -59.59   | -64.28 | 4.41  |
| BC-004   | -72.43   | -72.43   | -83.20   | -76.02 | 6.22  | -71.66   | -71.66   | -83.98   | -75.77 | 7.12  |
| BC-005   | -61.97   | -61.97   | -56.36   | -60.1  | 3.24  | -63.39   | -62.25   | -58.47   | -61.37 | 2.58  |
| BC-006   | -63.01   | -62.52   | -55.86   | -60.46 | 3.99  | -62.90   | -60.15   | -58.92   | -60.66 | 2.04  |
| BC-007   | -64.80   | -58.76   | -53.49   | -59.02 | 5.66  | -66.00   | -60.05   | -57.33   | -61.13 | 4.44  |
| BC-008   | -55.37   | -50.34   | -56.71   | -54.14 | 3.36  | -56.78   | -50.66   | -56.13   | -54.52 | 3.36  |
| BC-009   | -63.47   | -65.68   | -63.37   | -64.17 | 1.30  | -66.56   | -64.01   | -63.73   | -64.77 | 1.56  |
| BC-010   | -72.21   | -66.34   | -63.02   | -67.19 | 4.65  | -72.63   | -57.07   | -63.77   | -64.49 | 7.80  |
| BC-011   | -66.37   | -66.04   | -64.88   | -65.76 | 0.79  | -67.60   | -66.46   | -65.10   | -66.39 | 1.25  |
| BC-012   | -60.96   | -66.03   | -59.13   | -62.04 | 3.58  | -63.51   | -62.18   | -56.94   | -60.87 | 3.48  |
| BC-013   | -70.16   | -70.98   | -59.04   | -66.72 | 6.67  | -68.96   | -70.51   | -60.31   | -66.60 | 5.50  |
| VT-105   | -88.93   | -91.3    | -90.31   | -90.18 | 1.19  | -88.04   | -91.82   | -88.10   | -89.32 | 2.16  |
| VT-104   | -91.02   | -81.37   | -85.67   | -86.02 | 4.83  | -90.99   | -81.02   | -82.84   | -84.95 | 5.31  |
| EX64     | -77.01   | -74.84   | -78.32   | -76.72 | 1.76  | -77.47   | -67.30   | -72.95   | -72.57 | 5.10  |
| MSC-4106 | -65.32   | -65.02   | -62.75   | -64.37 | 1.41  | -64.82   | -64.91   | -62.87   | -64.20 | 1.15  |
| Merck_20 | -61.94   | -60.97   | -59.62   | -60.84 | 1.17  | -61.53   | -59.25   | -59.76   | -60.18 | 1.20  |

SD, Standard deviation

**Table S6.** The post-MD MM-GBSA analysis of three different replicas (continued).

| Compound | 20ns     |          |          |        |      | 50ns     |          |          |        |      |
|----------|----------|----------|----------|--------|------|----------|----------|----------|--------|------|
|          | Replica1 | Replica2 | Replica3 | Mean   | SD   | Replica1 | Replica2 | Replica3 | Mean   | SD   |
| BC-001   | -65.94   | -64.73   | -70.77   | -67.15 | 3.19 | -68.97   | -64.96   | -69.11   | -67.68 | 2.36 |
| BC-002   | -64.80   | -60.46   | -58.42   | -61.23 | 3.26 | -62.28   | -59.18   | -55.93   | -59.13 | 3.17 |
| BC-003   | -68.48   | -64.49   | -65.68   | -66.22 | 2.05 | -65.57   | -64.37   | -63.63   | -64.52 | 0.98 |
| BC-004   | -71.98   | -71.98   | -78.78   | -74.24 | 3.93 | -68.36   | -68.36   | -76.14   | -70.95 | 4.49 |
| BC-005   | -63.01   | -63.01   | -60.70   | -62.24 | 1.34 | -59.62   | -59.62   | -58.95   | -59.39 | 0.39 |
| BC-006   | -65.06   | -57.90   | -62.55   | -61.84 | 3.63 | -66.62   | -56.49   | -62.59   | -61.90 | 5.10 |
| BC-007   | -67.50   | -58.38   | -60.07   | -61.98 | 4.85 | -68.25   | -55.41   | -55.58   | -59.75 | 7.37 |
| BC-008   | -56.47   | -51.69   | -52.92   | -53.70 | 2.48 | -57.50   | -52.94   | -50.93   | -53.79 | 3.36 |
| BC-009   | -67.09   | -65.10   | -62.17   | -64.79 | 2.47 | -67.45   | -59.44   | -62.39   | -63.09 | 4.05 |
| BC-010   | -72.45   | -60.71   | -60.58   | -64.58 | 6.82 | -70.67   | -62.97   | -63.87   | -65.84 | 4.21 |
| BC-011   | -68.12   | -66.42   | -65.42   | -66.66 | 1.36 | -69.29   | -66.23   | -68.65   | -68.05 | 1.61 |
| BC-012   | -63.87   | -60.25   | -55.77   | -59.96 | 4.06 | -62.37   | -58.16   | -56.58   | -59.04 | 2.99 |
| BC-013   | -69.62   | -66.05   | -62.30   | -65.99 | 3.66 | -70.66   | -57.06   | -61.62   | -63.11 | 6.92 |
| VT-105   | -89.27   | -91.61   | -89.58   | -90.15 | 1.27 | -90.32   | -91.30   | -91.10   | -90.91 | 0.52 |
| VT-104   | -91.59   | -78.57   | -80.02   | -83.39 | 7.13 | -91.41   | -72.50   | -78.27   | -80.73 | 9.69 |
| EX64     | -78.82   | -68.75   | -70.20   | -72.59 | 5.44 | -82.22   | -67.30   | -69.92   | -73.15 | 7.97 |
| MSC-4106 | -64.26   | -64.79   | -62.72   | -63.92 | 1.08 | -63.44   | -63.91   | -63.85   | -63.73 | 0.25 |
| Merck_20 | -60.89   | -57.79   | -59.63   | -59.44 | 1.56 | -60.84   | -58.22   | -58.53   | -59.20 | 1.43 |

SD, Standard deviation

**Table S6.** The post-MD MM-GBSA analysis of three different replicas (continued).

| Compound | 100ns    |          |          |        |      | RMSD Stable |          |          |        |      |
|----------|----------|----------|----------|--------|------|-------------|----------|----------|--------|------|
|          | Replica1 | Replica2 | Replica3 | Mean   | SD   | Replica1    | Replica2 | Replica3 | Mean   | SD   |
| BC-001   | -69.53   | -65.16   | -68.79   | -67.83 | 2.34 | -71.55      | -68.82   | -63.82   | -68.06 | 3.92 |
| BC-002   | -61.48   | -57.98   | -60.04   | -59.84 | 1.76 | -66.18      | -61.50   | -61.51   | -63.06 | 2.70 |
| BC-003   | -63.73   | -61.50   | -61.85   | -62.36 | 1.20 | -62.16      | -64.18   | -67.58   | -64.64 | 2.74 |
| BC-004   | -69.16   | -69.16   | -74.11   | -70.81 | 2.86 | -70.51      | -69.31   | -74.61   | -71.48 | 2.78 |
| BC-005   | -58.71   | -58.71   | -55.49   | -57.64 | 1.86 | -60.78      | -55.72   | -60.71   | -59.07 | 2.90 |
| BC-006   | -66.74   | -60.42   | -62.97   | -63.38 | 3.18 | -67.30      | -59.37   | -65.55   | -64.07 | 4.17 |
| BC-007   | -66.95   | -54.19   | -55.81   | -58.98 | 6.95 | -67.73      | -58.29   | -58.90   | -61.64 | 5.28 |
| BC-008   | -59.69   | -49.62   | -49.23   | -52.85 | 5.93 | -59.66      | -49.33   | -46.82   | -51.94 | 6.81 |
| BC-009   | -65.46   | -56.77   | -60.18   | -60.81 | 4.38 | -65.91      | -59.23   | -59.26   | -61.47 | 3.85 |
| BC-010   | -70.66   | -63.31   | -65.54   | -66.51 | 3.77 | -70.17      | -69.72   | -67.22   | -69.04 | 1.59 |
| BC-011   | -70.36   | -67.10   | -69.13   | -68.86 | 1.65 | -70.99      | -68.03   | -69.74   | -69.58 | 1.48 |
| BC-012   | -60.08   | -54.65   | -55.58   | -56.77 | 2.91 | -57.13      | -49.53   | -52.70   | -53.12 | 3.82 |
| BC-013   | -70.38   | -57.24   | -61.00   | -62.87 | 6.77 | -70.94      | -55.76   | -56.52   | -61.07 | 8.55 |
| VT-105   | -90.08   | -91.31   | -91.78   | -91.06 | 0.88 | -91.69      | -91.21   | -91.06   | -91.32 | 0.33 |
| VT-104   | -91.16   | -75.11   | -76.15   | -80.81 | 8.98 | -91.45      | -79.16   | -79.14   | -83.25 | 7.10 |
| EX64     | -82.28   | -66.64   | -66.33   | -71.75 | 9.12 | -81.93      | -71.45   | -66.06   | -73.15 | 8.07 |
| MSC-4106 | -63.89   | -63.89   | -63.58   | -63.79 | 0.17 | -64.72      | -63.38   | -62.94   | -63.68 | 0.93 |
| Merck_20 | -60.40   | -59.38   | -58.77   | -59.51 | 0.83 | -60.27      | -60.06   | -59.40   | -59.91 | 0.45 |

SD, Standard deviation
